# Supplementary material
Source: Springer Nature journal article supplement (https://www.springermedizin.de/resource/supplementary/12935_2009_272_MOESM6_ESM.pdf/9540202)

EFNA1

EphA2

EFNA1 + EphA2

A

A1 FI

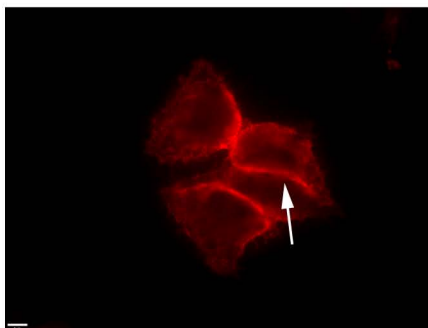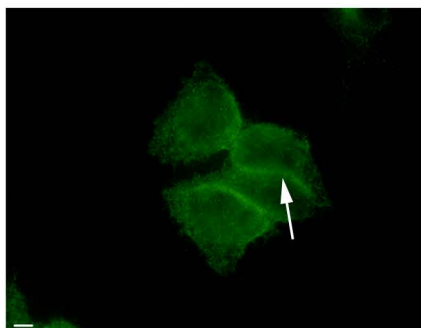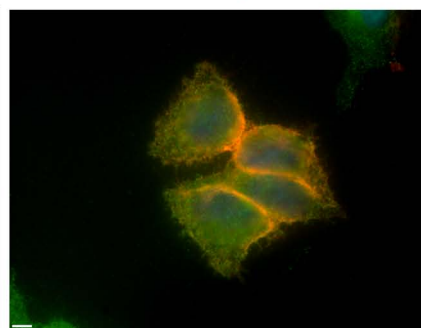

B

A1 FI

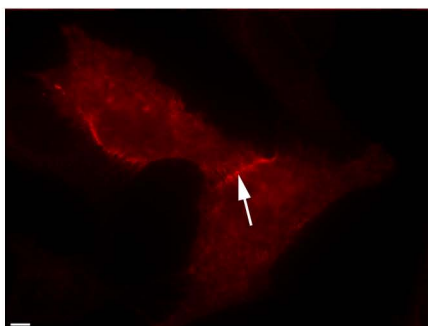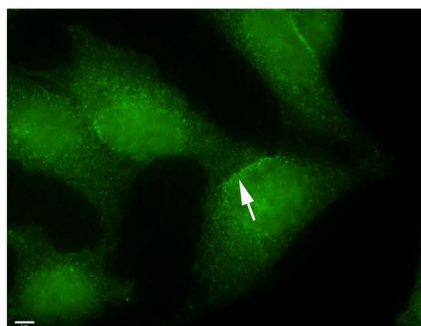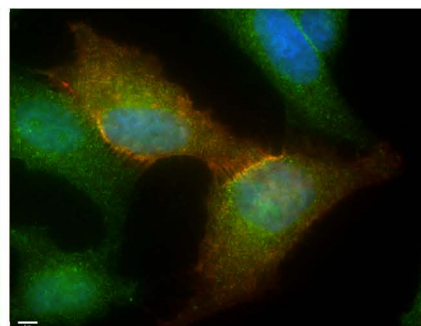

C

A1  
-ve GPI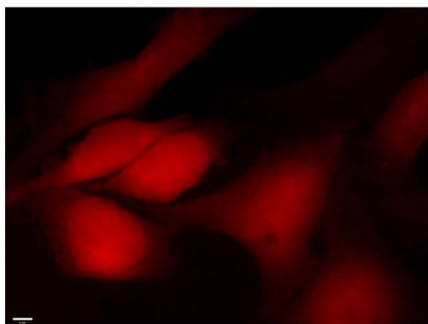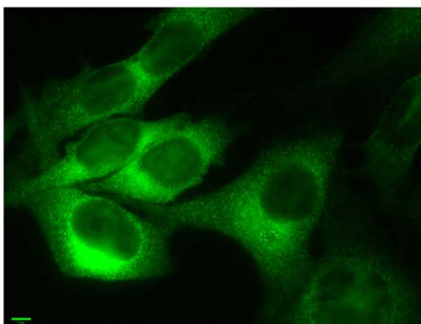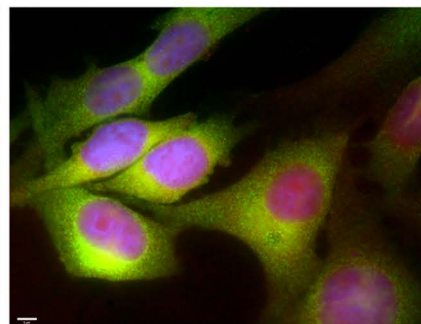

D

A1  
-ve GPI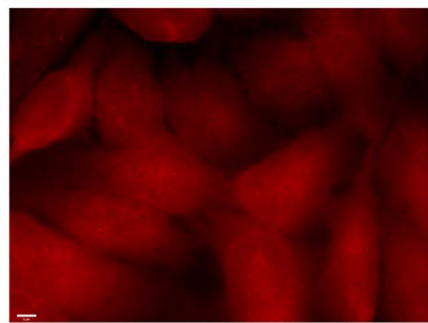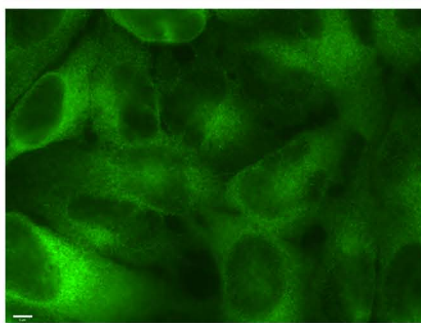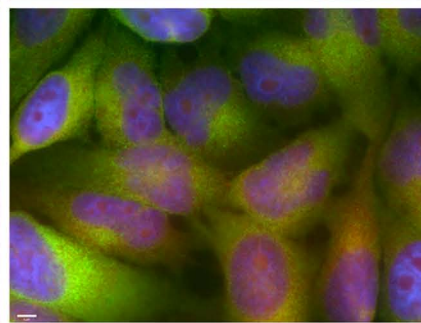

Supplement: MOESM6 [file 9540202]
